# Supplementary material for: In silico and in vivo studies of gp120-HIV-derived peptides in complex with G4-PAMAM dendrimers
Source: Royal Society of Chemistry journal article supplement (doi:10.1039/d0ra00840k), 2020-01-01
Supplement: d0ra00840k1.pdf [file d0ra00840k1.pdf]

## SUPPEMENTARY MATERIAL

| Peptide epitope | Sequence      | Amino acids | mw (g/mol) | Predicted aqueous solubility | Net charge at pH 7.0 | Isoelectric point | Type | SVM Score | Prediction |
|-----------------|---------------|-------------|------------|------------------------------|----------------------|-------------------|------|-----------|------------|
| pPGT122         | DIIGDIRQAH    | 10          | 1137.26    | Soluble                      | -0.9                 | 5.1               | acid | -0.62     | Non-toxic  |
| pVRC03          | DGGANNTSNETFR | 13          | 1382.37    | Soluble                      | -1                   | 4.07              | acid | -1.05     | Non-toxic  |

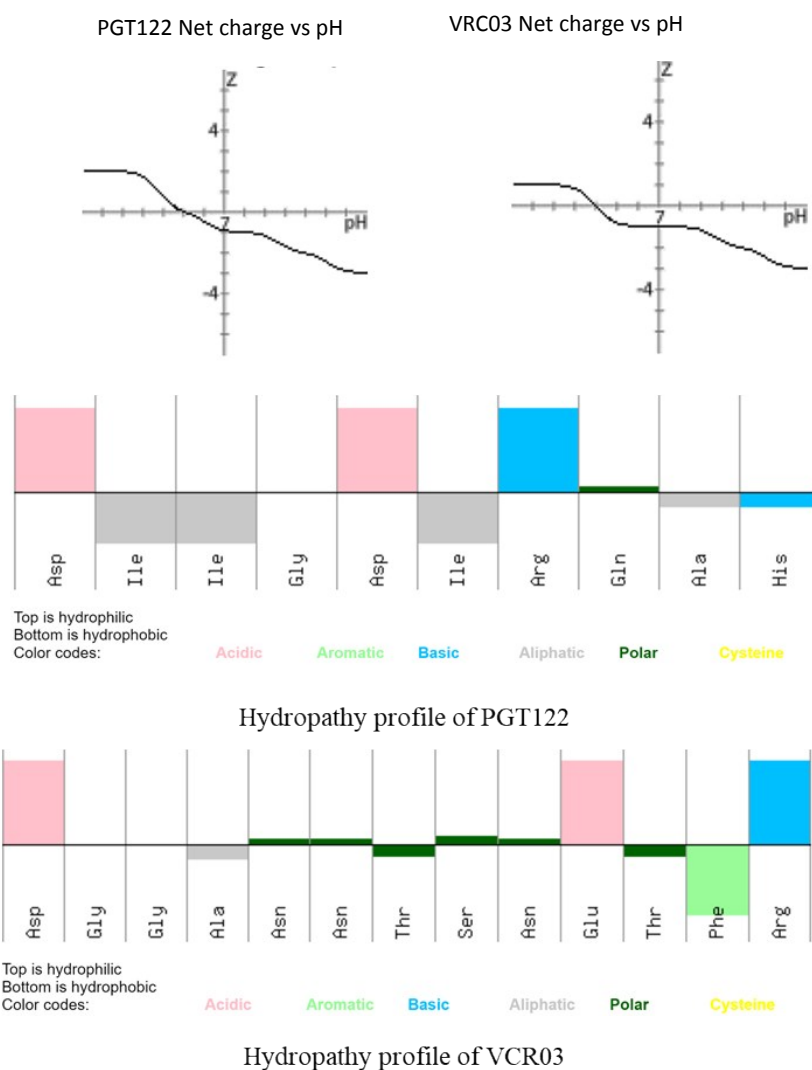

**Figure 1S** Physicochemical properties and toxicity of pPGT122 and pVRC03.

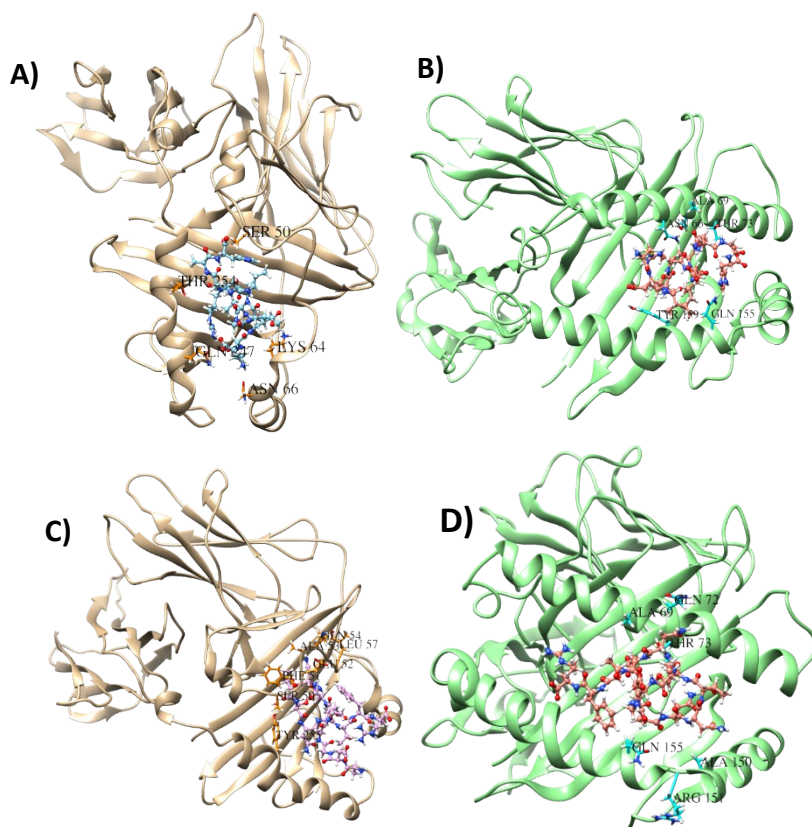

**Figure 2S.-** Docking studies of peptides on MHC I/II **A)** PGT122-MHC-II complex, **B)** pVRC03-MHC-II complex, **C)** pPGT122-MHC-I complex, and **D)** pVRC03-MHC-I complex at the end of the MD simulations.
